# Supplementary material
Source: PubMed Central journal article supplement (PMC5777024)
Supplement: pnas.1703601115.sapp.pdf [file pnas.1703601115.sapp.pdf]

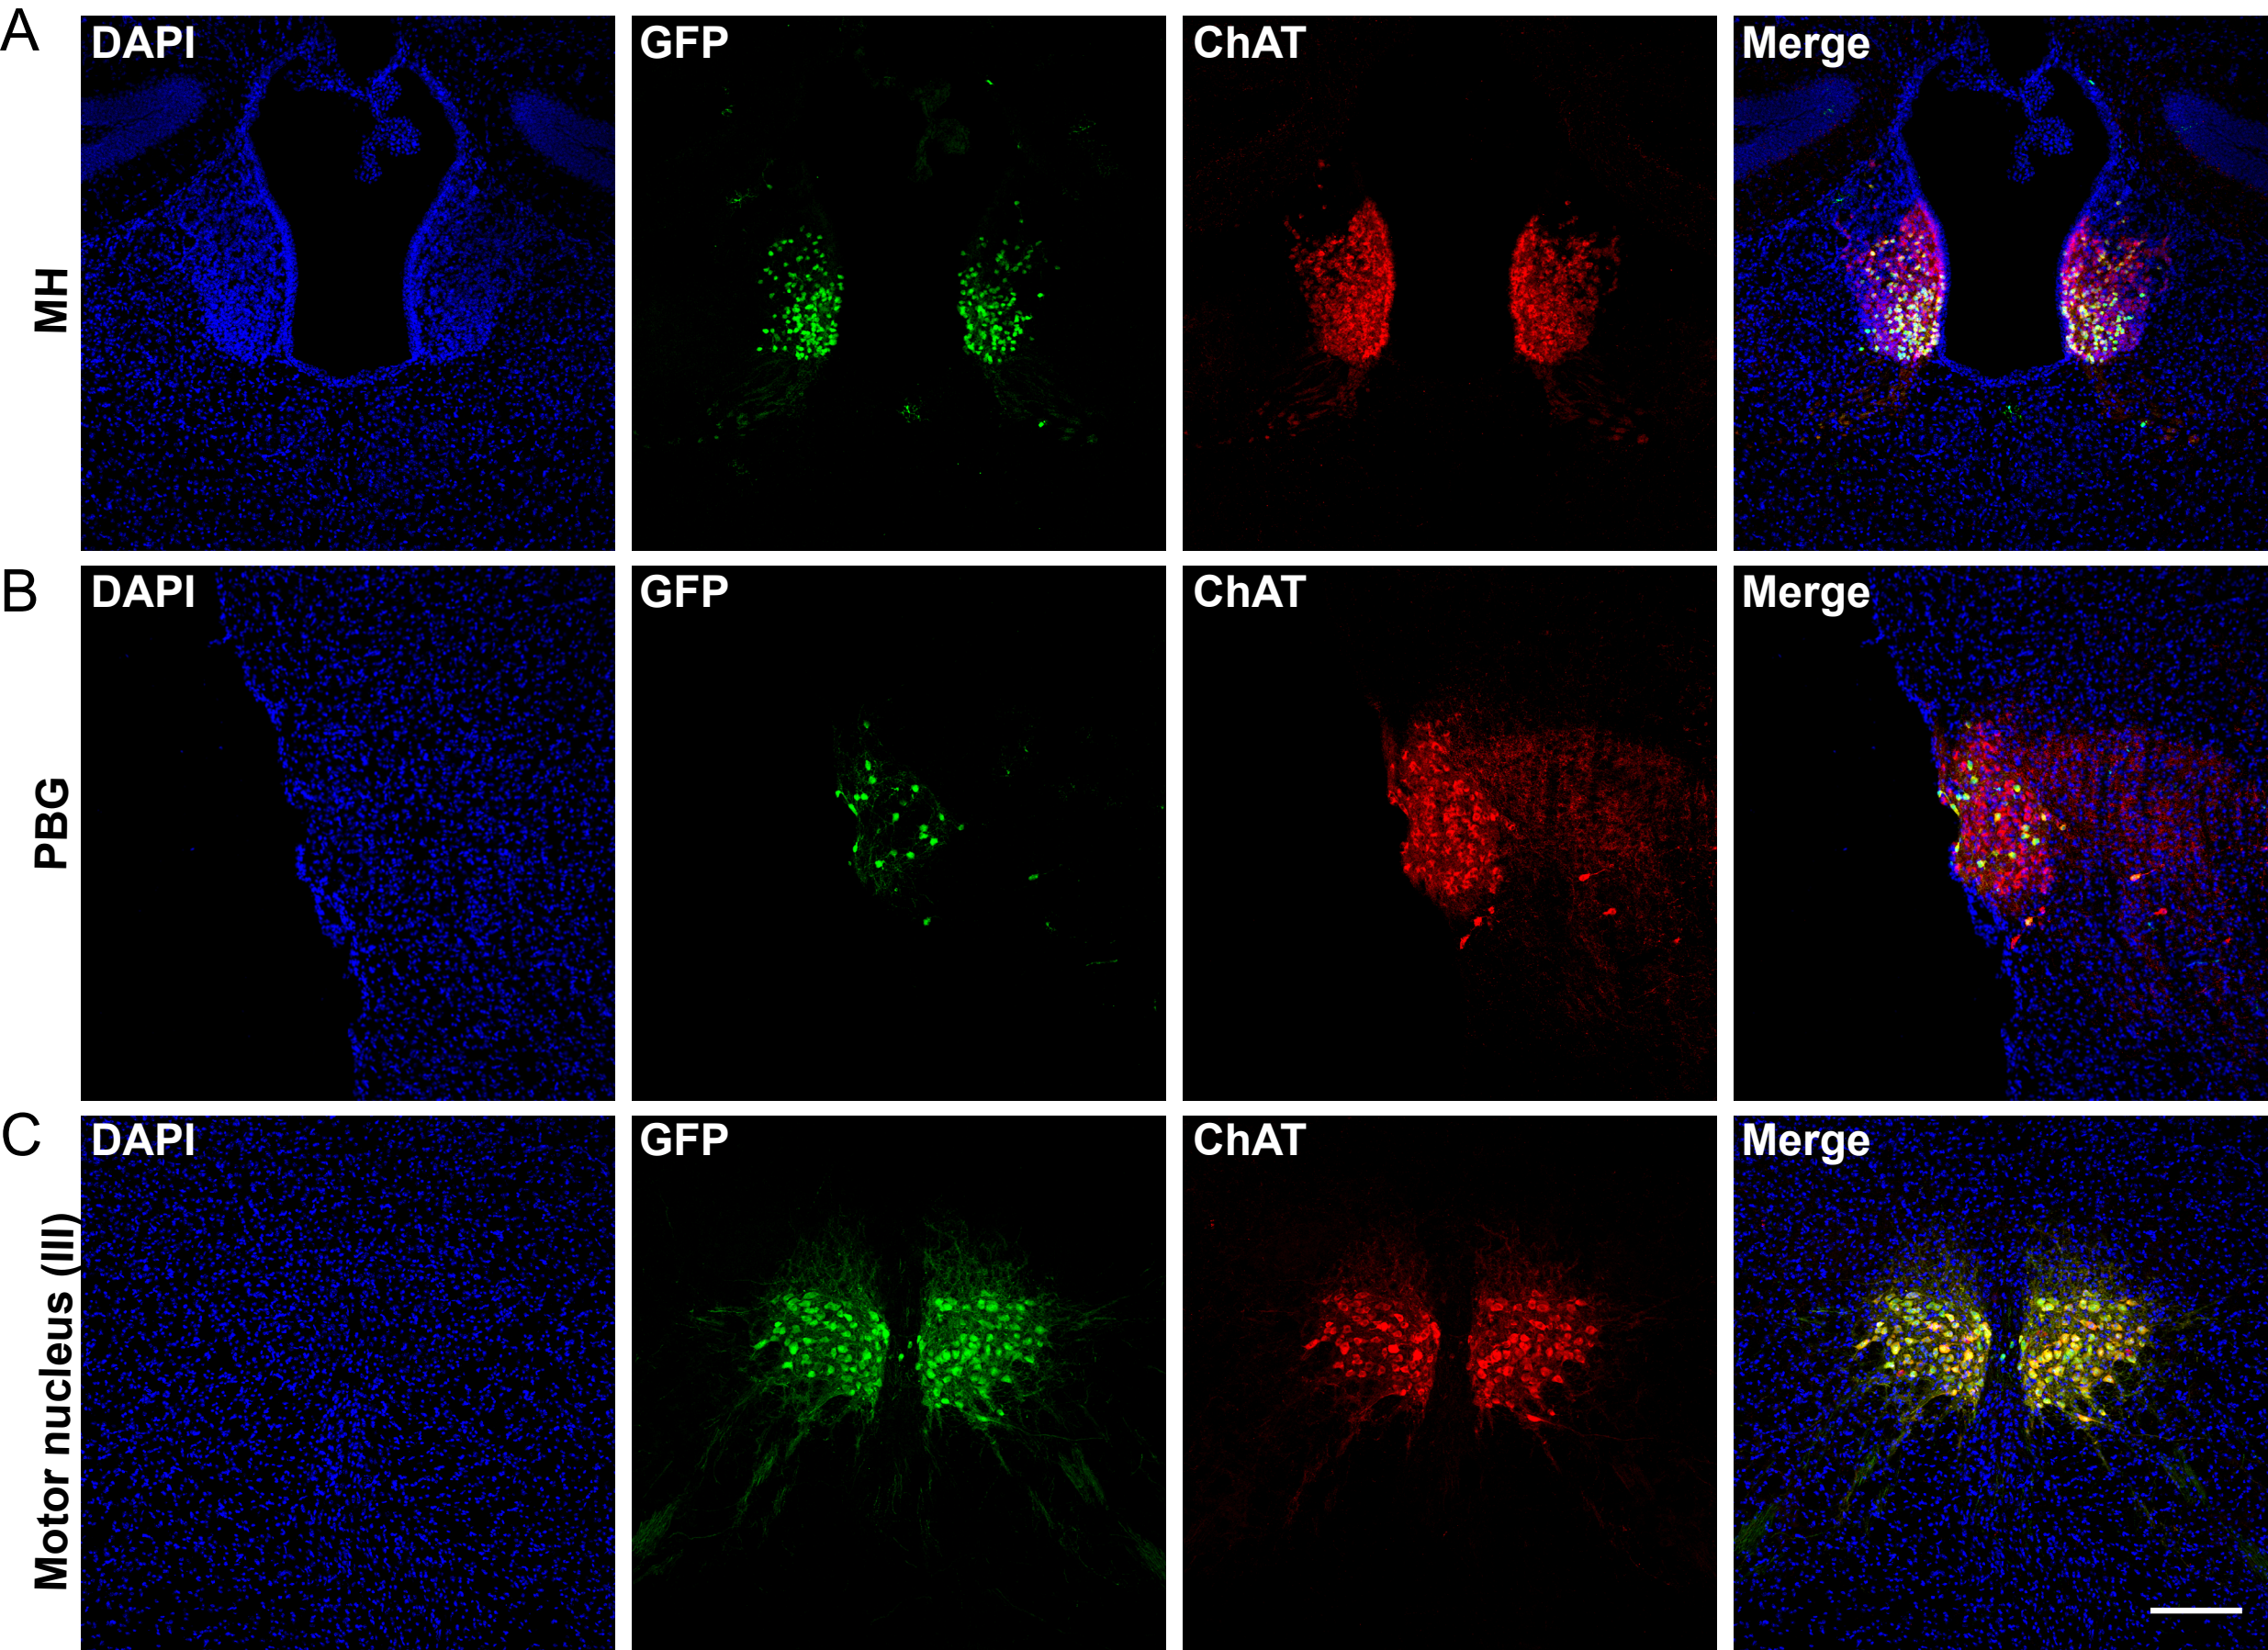

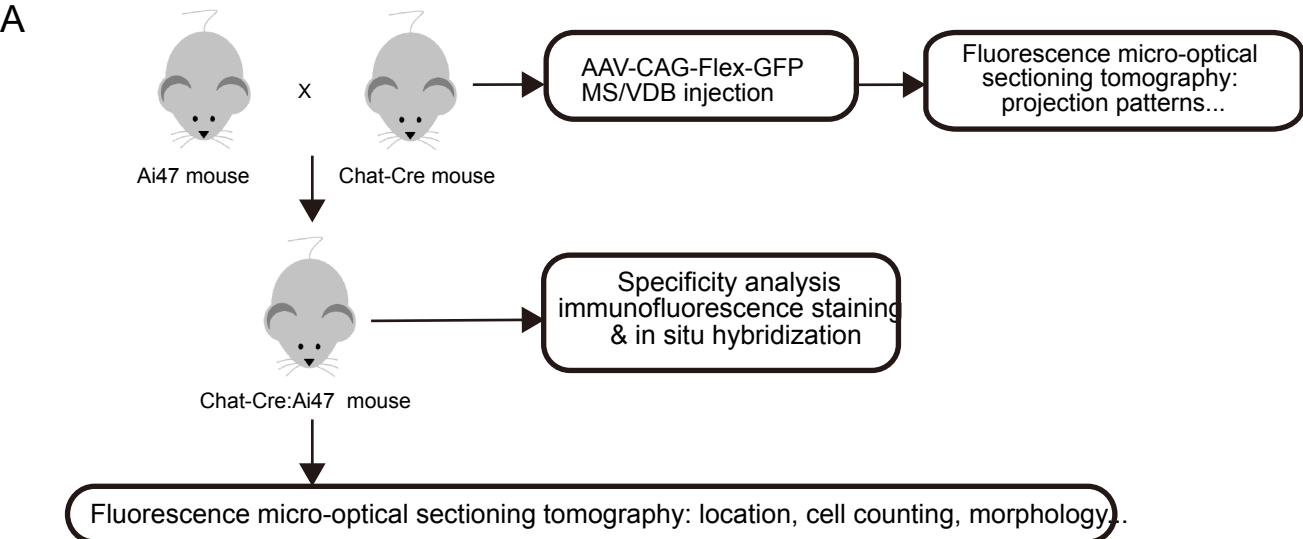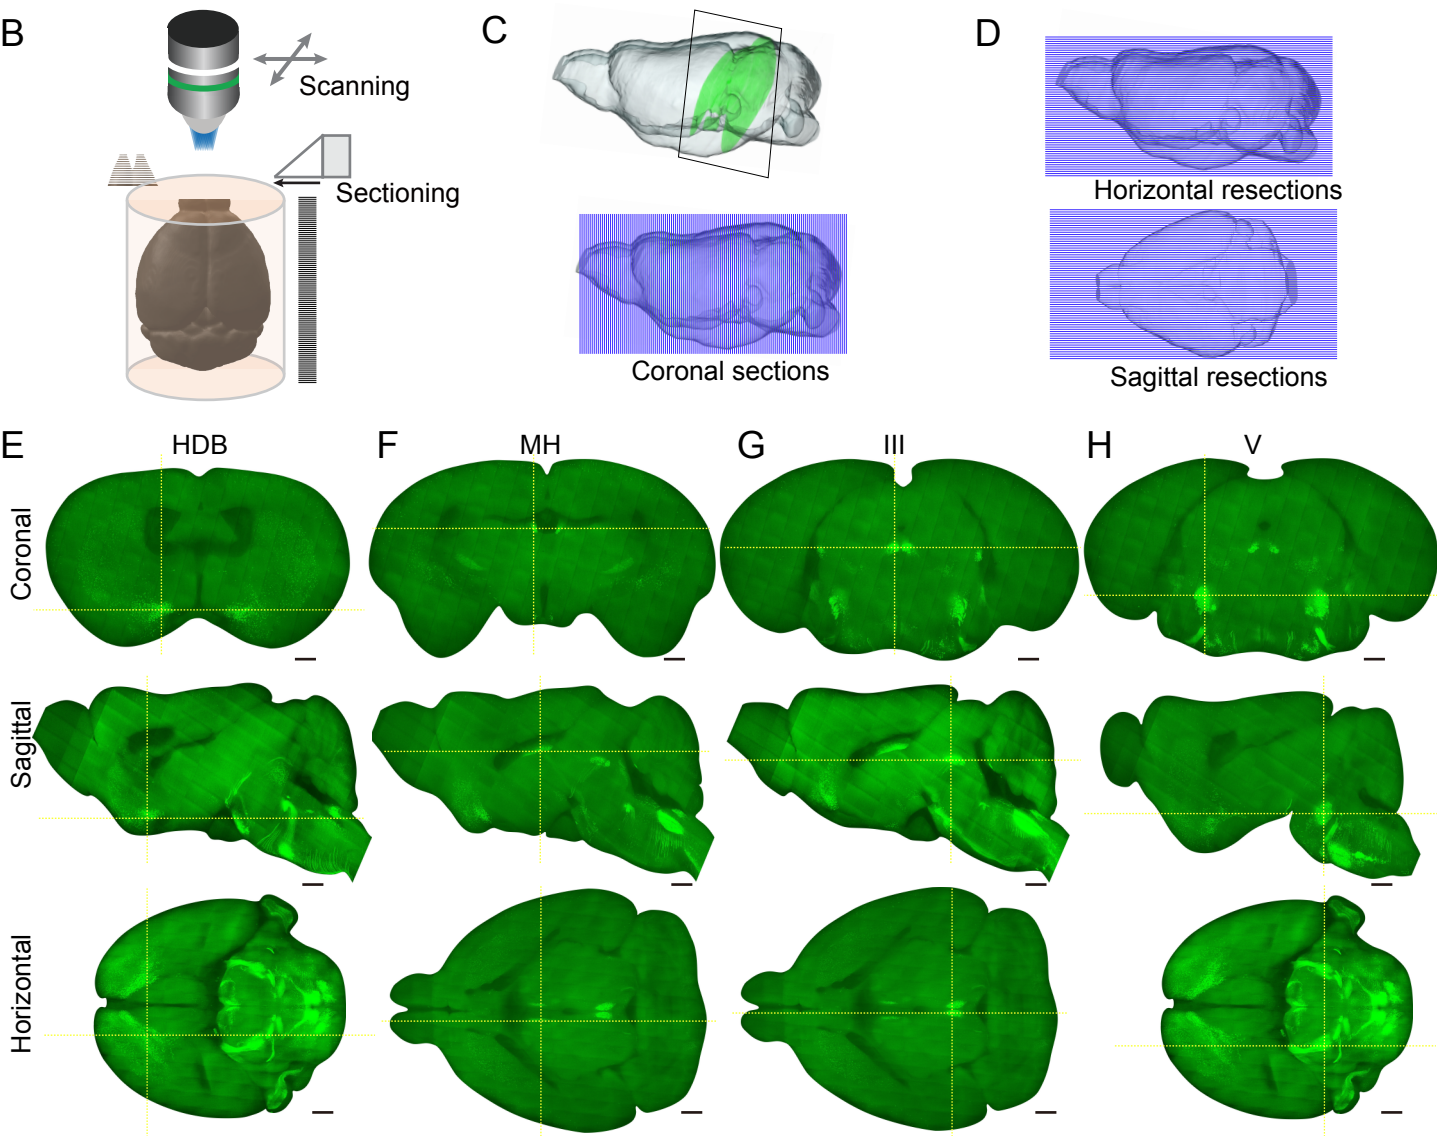

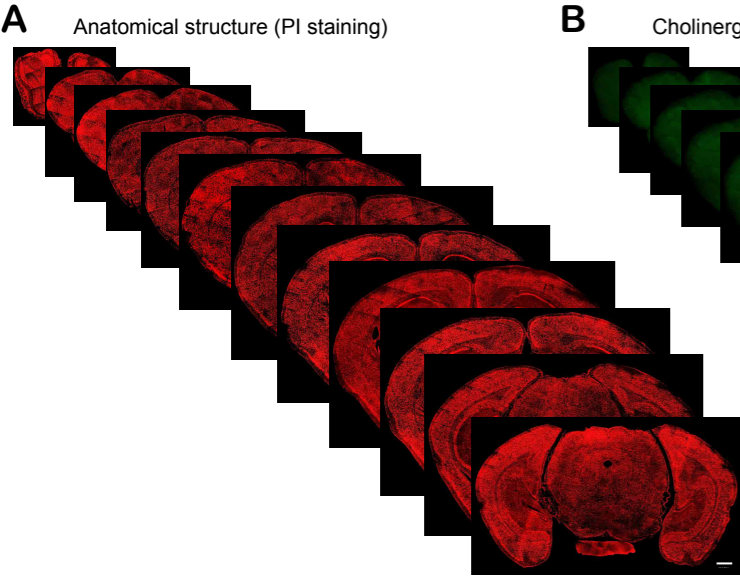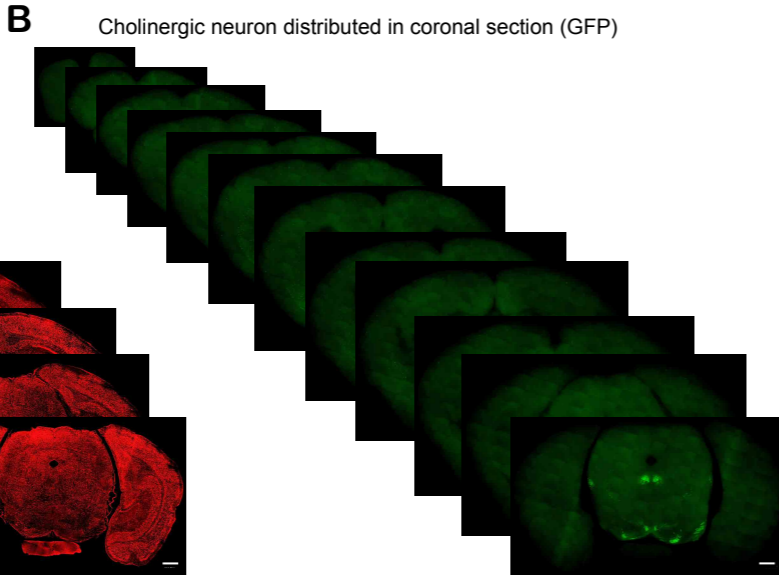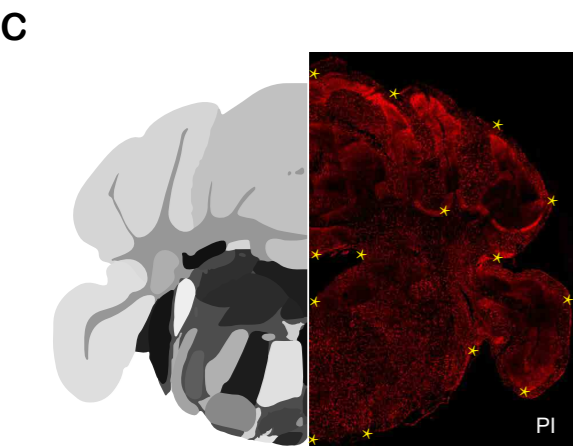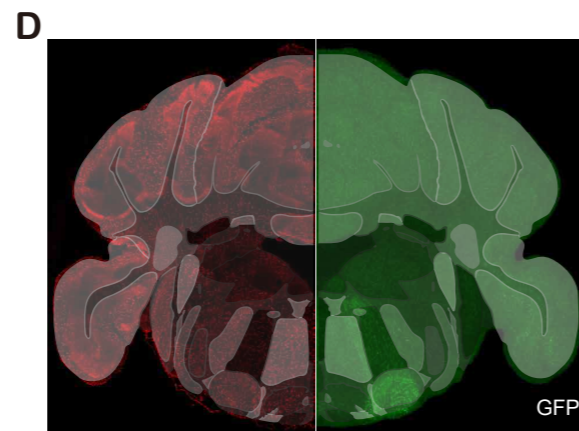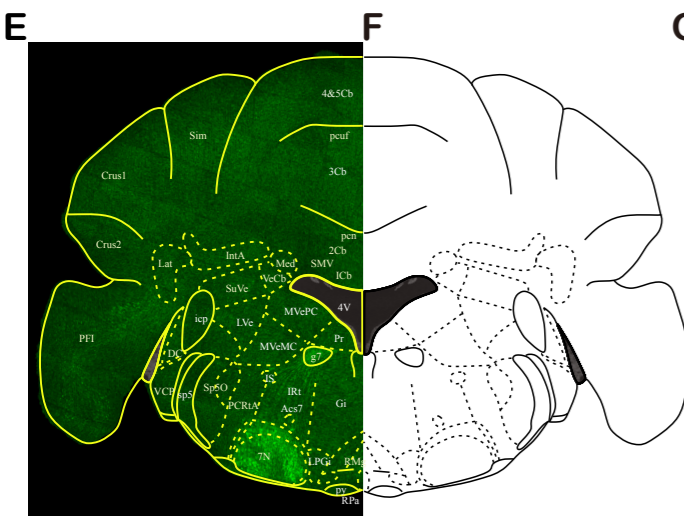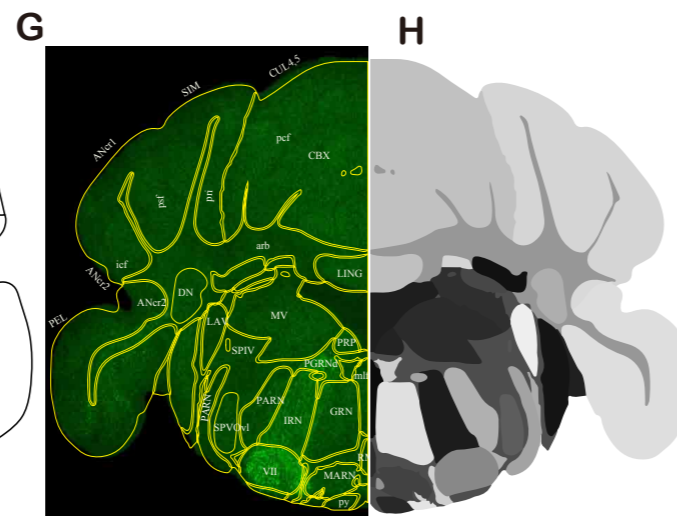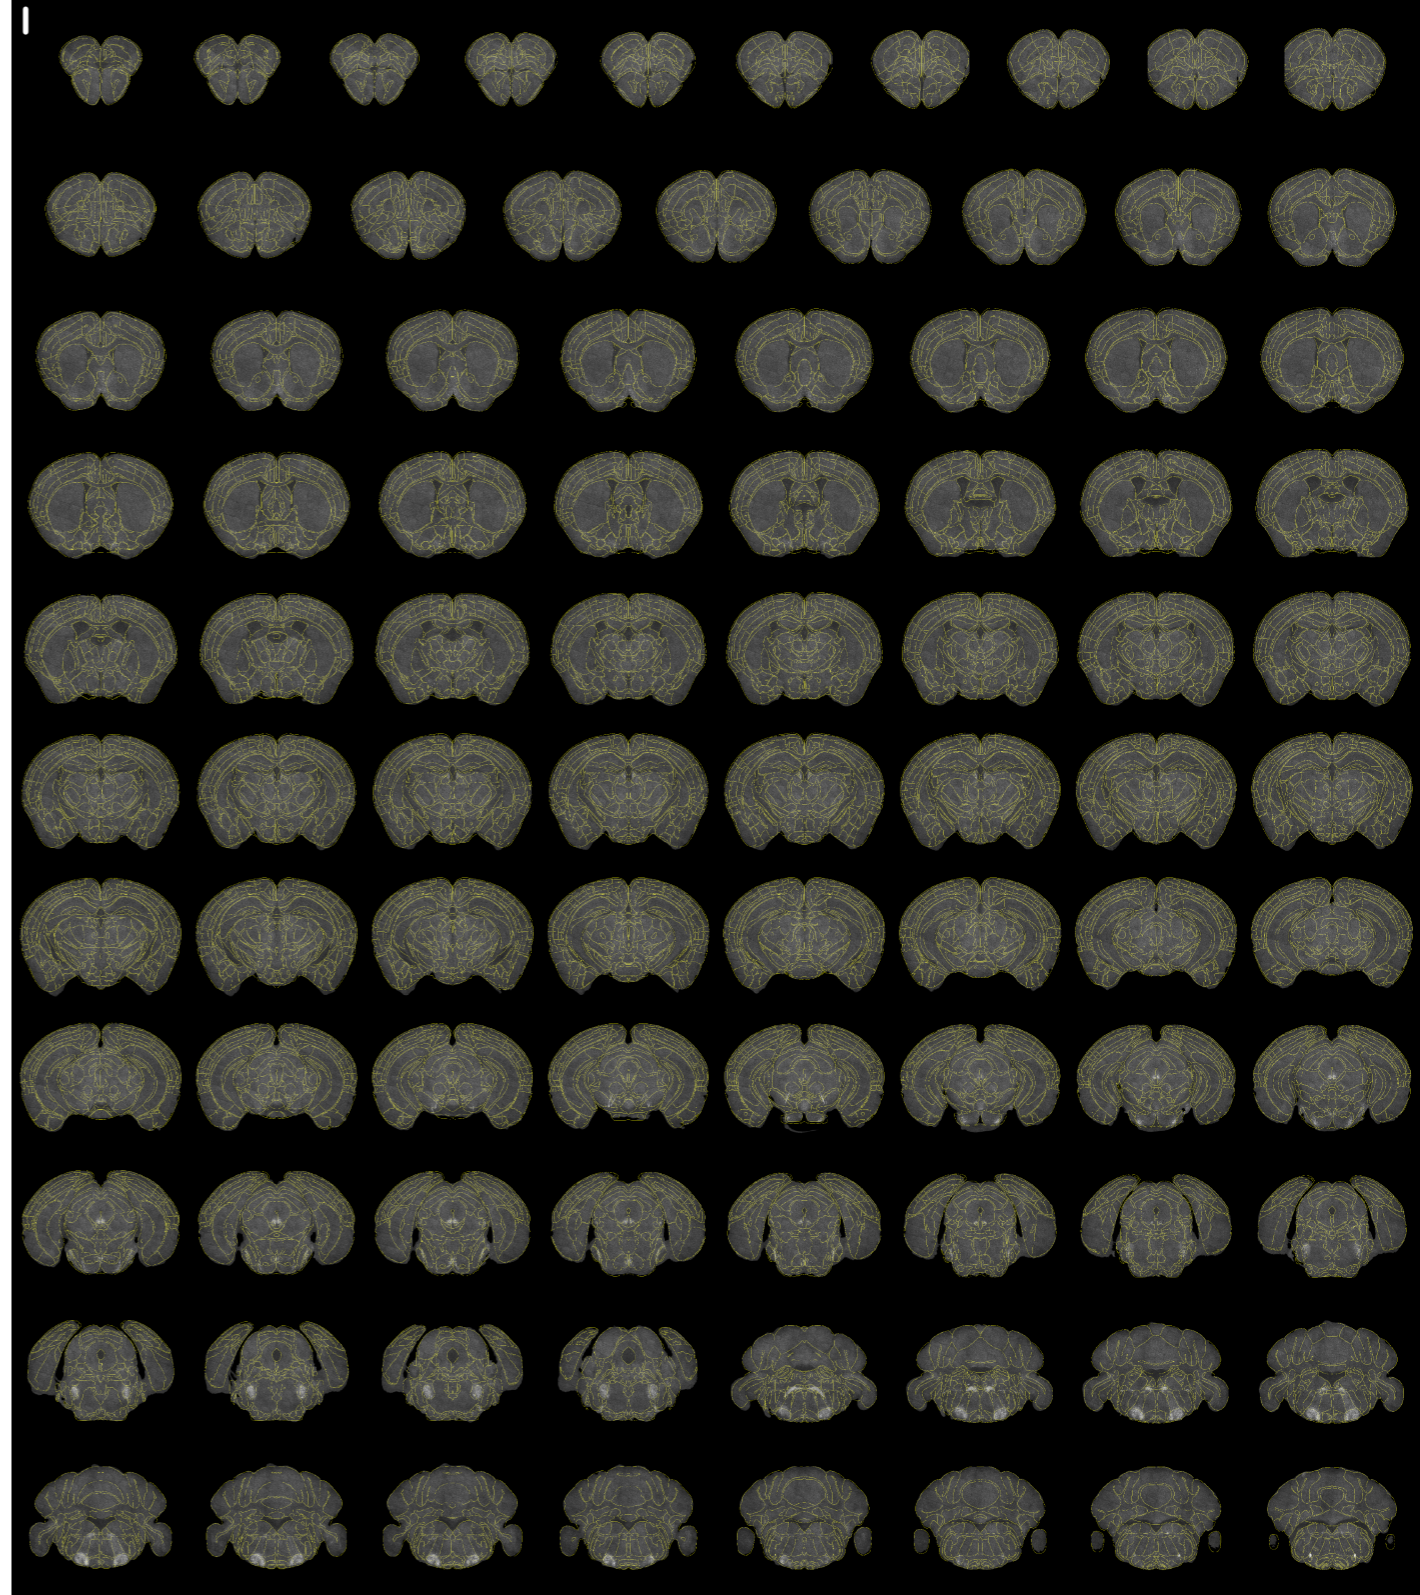

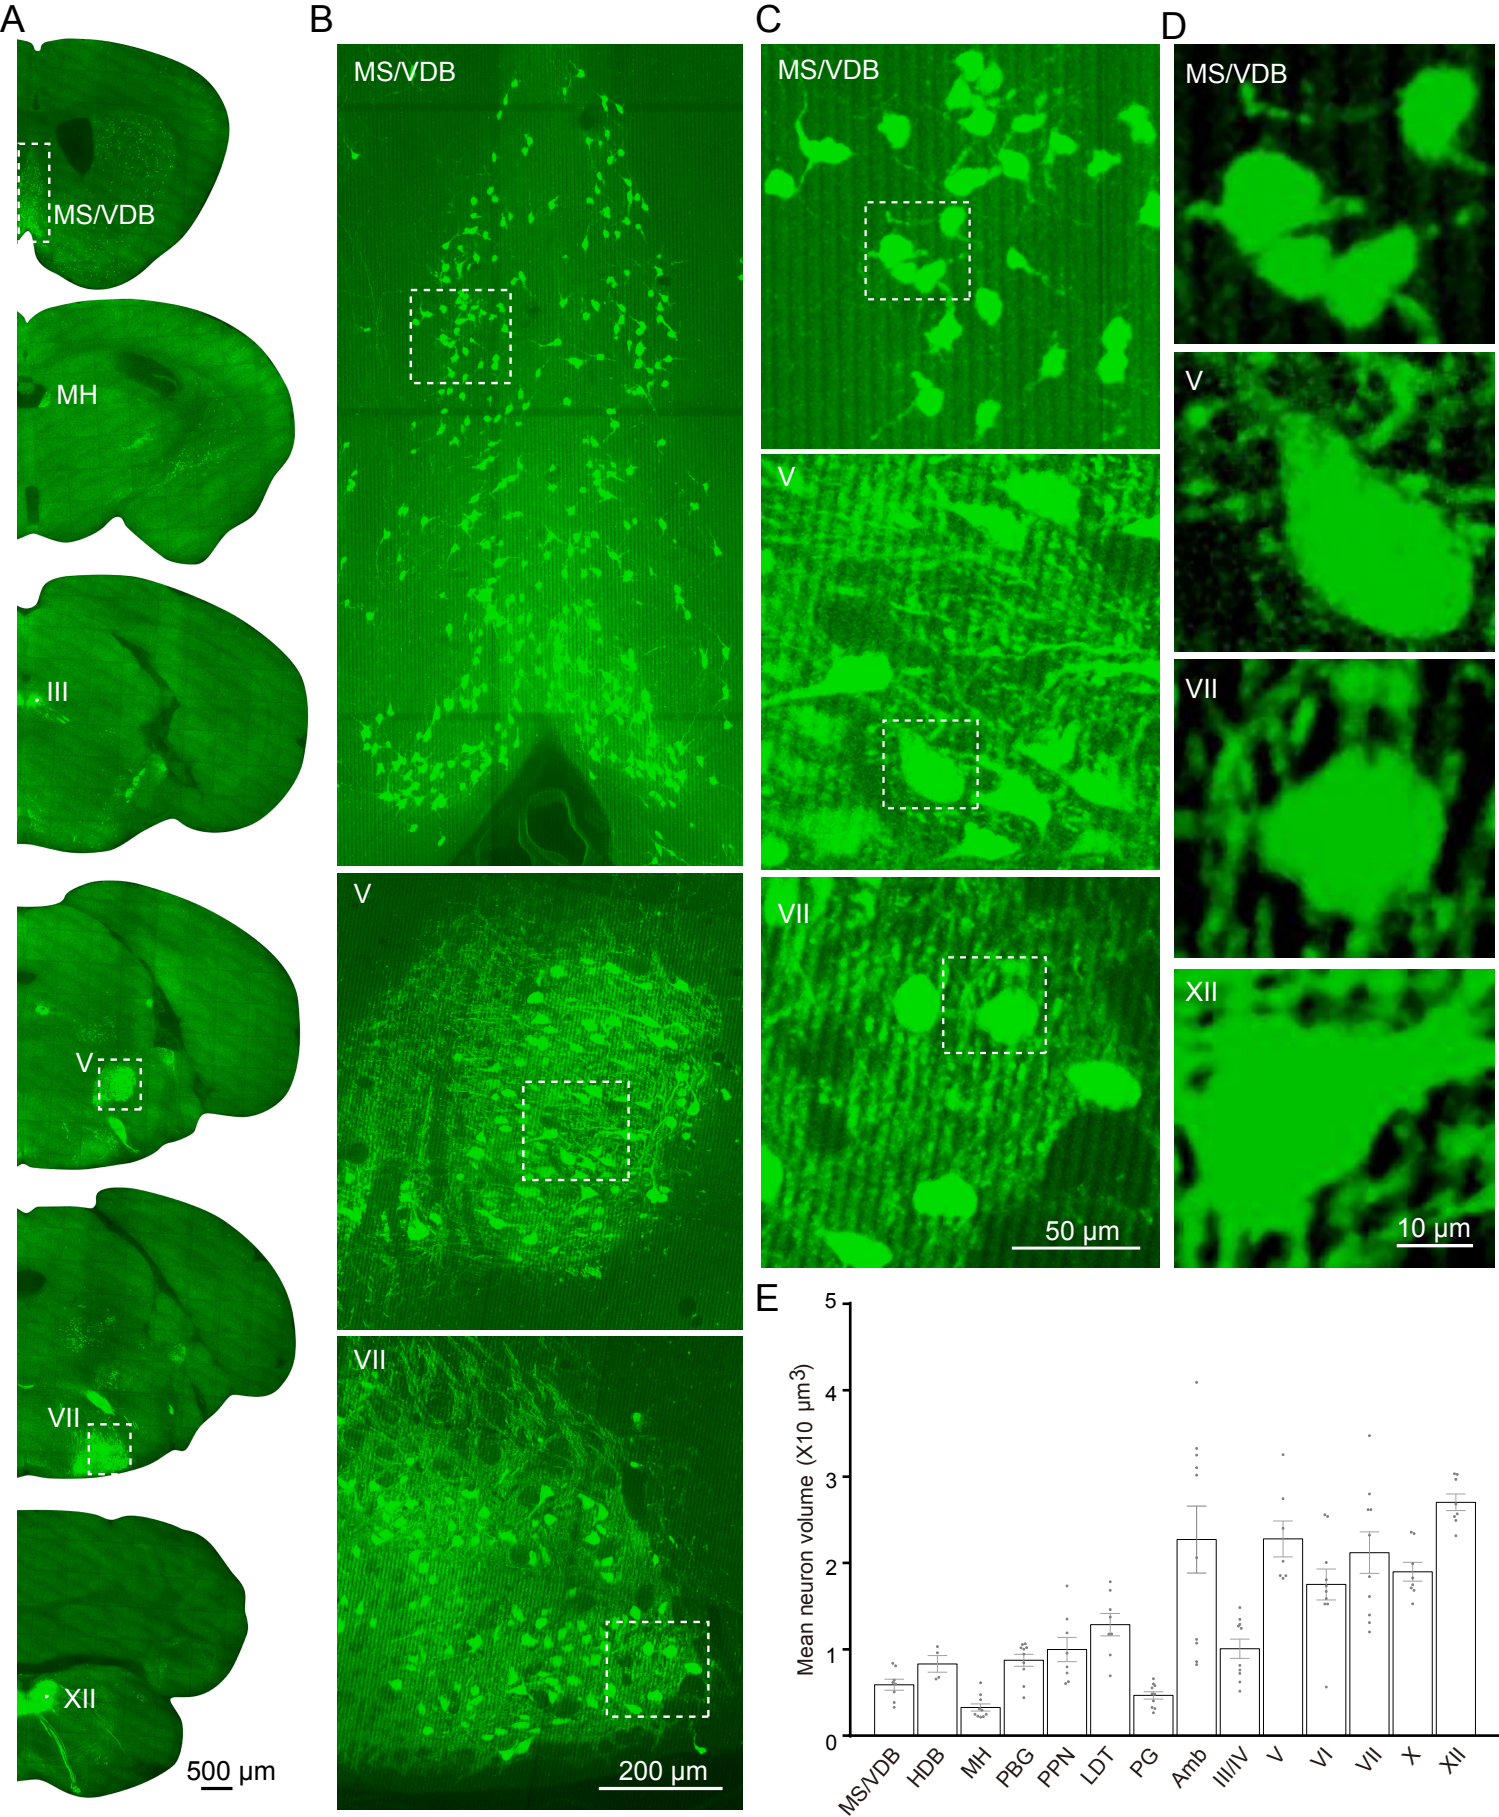

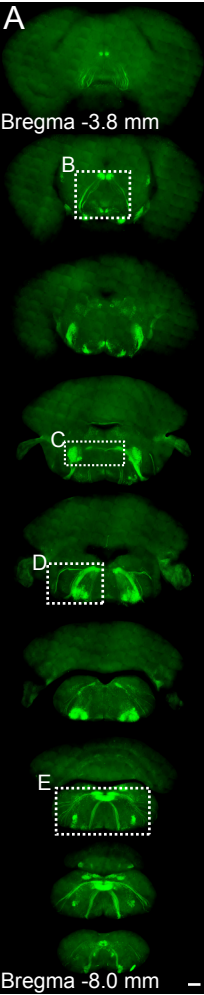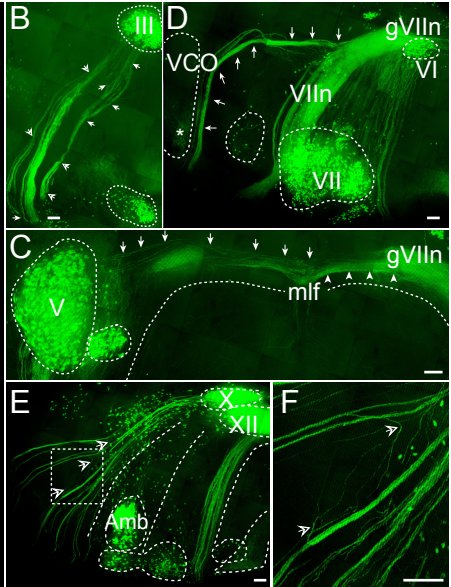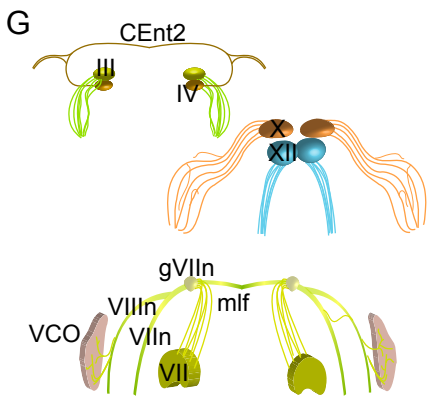

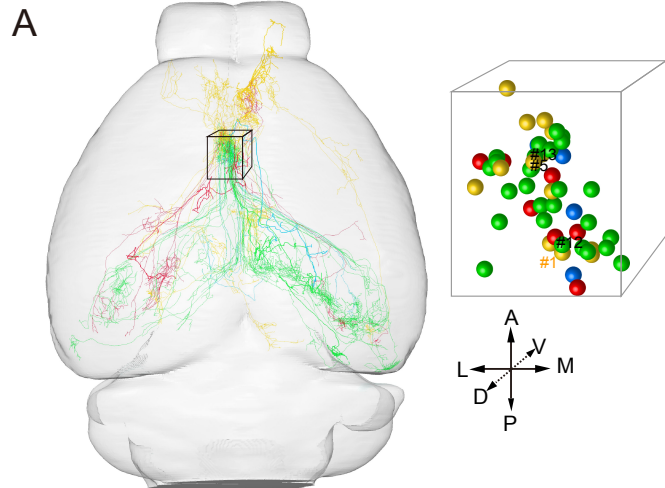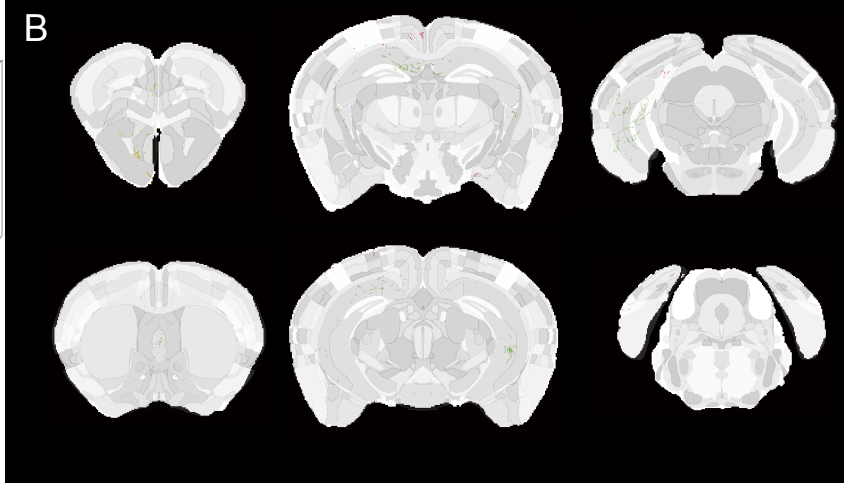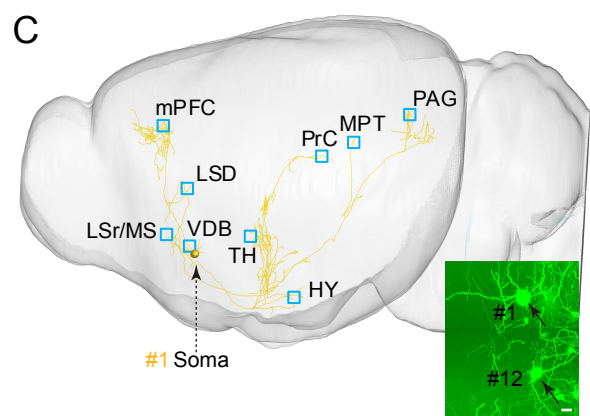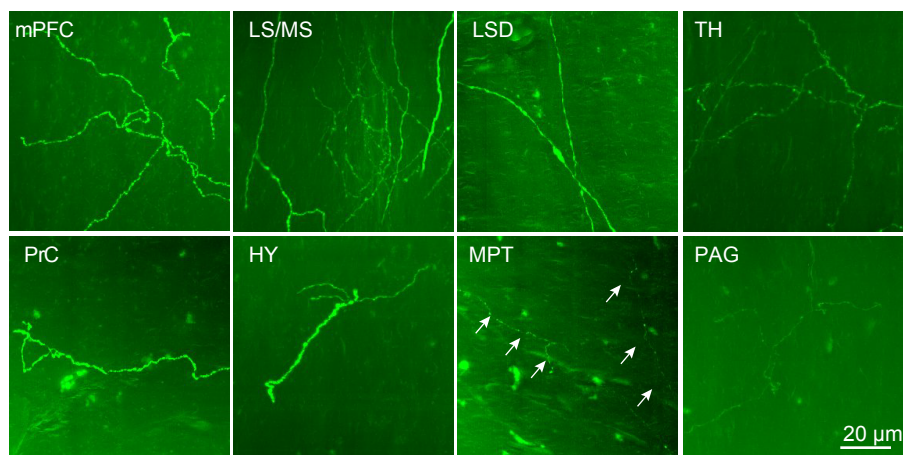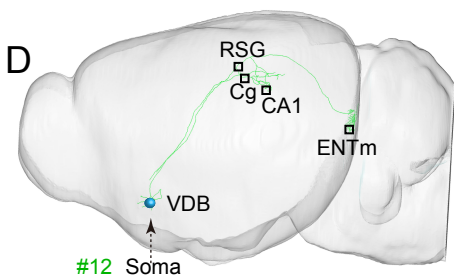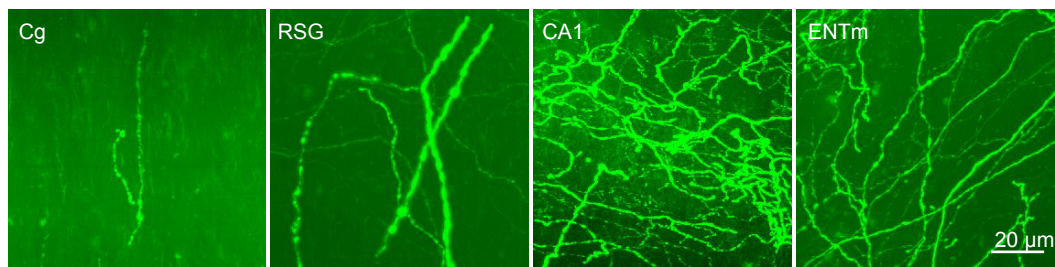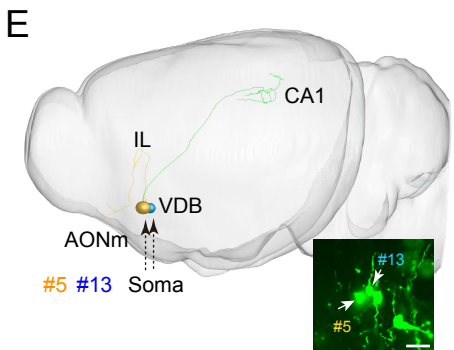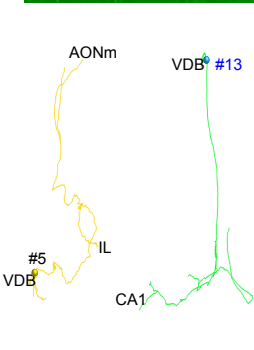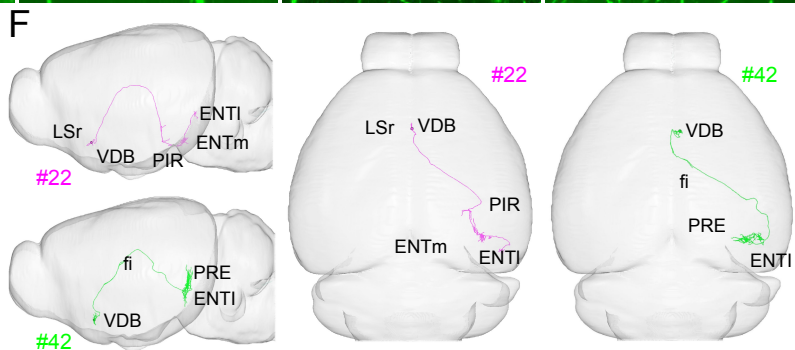



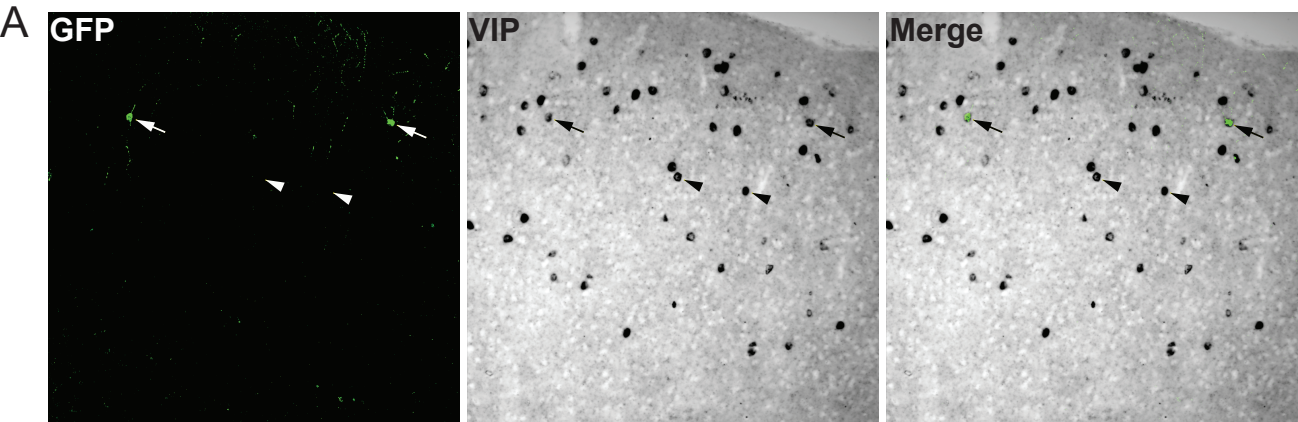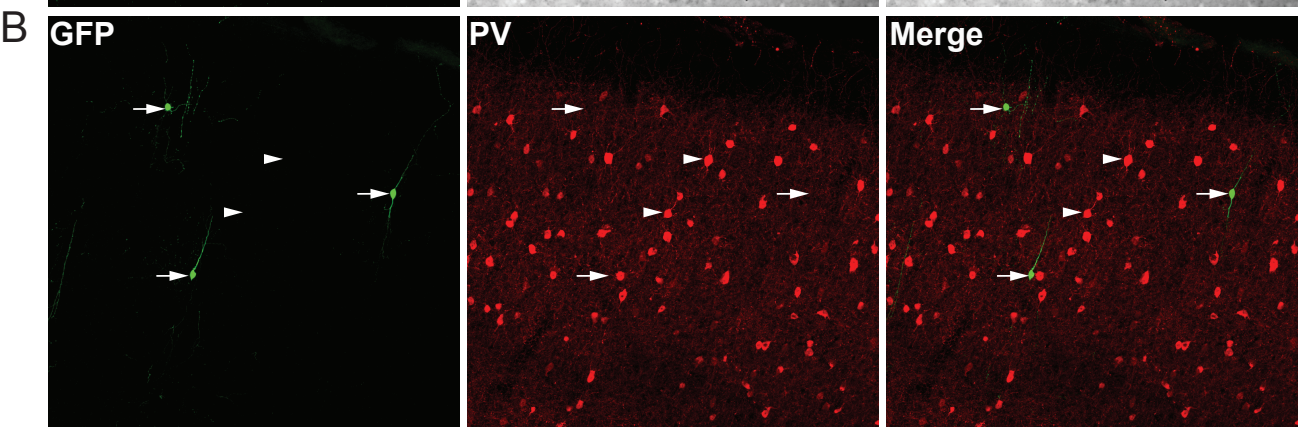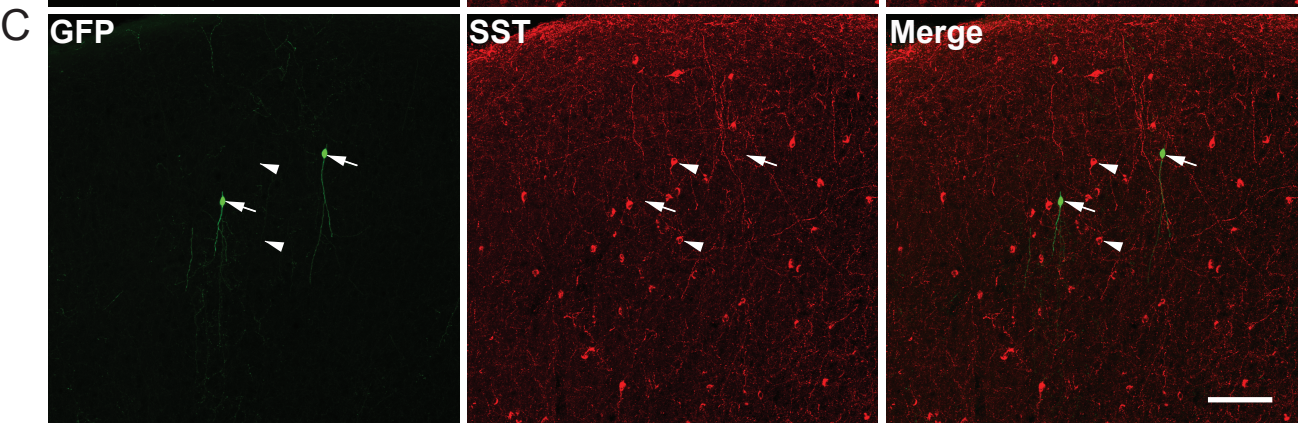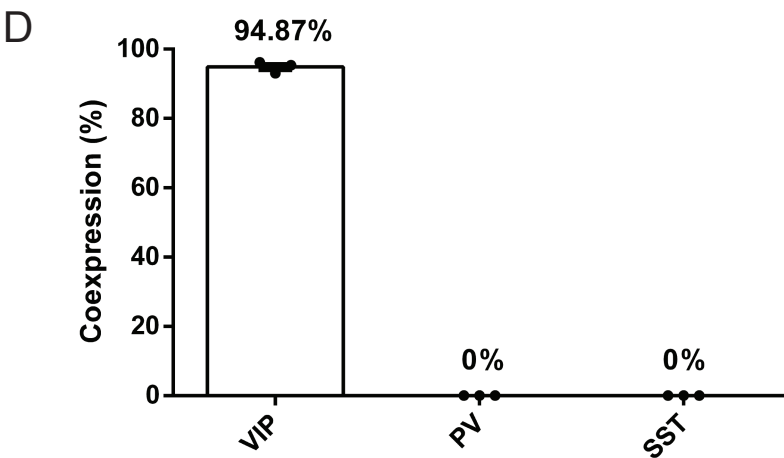



**Table S1.** Colocalization (percentage of GFP positive neurons expressing ChAT) and labeling ratios (percentage of ChAT positive neurons expressing GFP) of Chat-Cre: Ai47 mice in different brain regions.

| <b>Brain region</b> | <b>Mouse NO.</b> | <b>GFP+ NO.</b> | <b>ChAT+ NO.</b> | <b>Colocalization (%)</b> | <b>Labeling (%)</b> |
|---------------------|------------------|-----------------|------------------|---------------------------|---------------------|
| <b>MOp</b>          | 3                | 65              | 241              | 92.31                     | 24.90               |
| <b>MOs</b>          | 3                | 39              | 159              | 89.74                     | 22.01               |
| <b>mPFC</b>         | 3                | 26              | 65               | 96.15                     | 38.46               |
| <b>SSp</b>          | 3                | 101             | 294              | 98.02                     | 33.67               |
| <b>VISp</b>         | 3                | 65              | 228              | 89.23                     | 25.44               |
| <b>MS/VDB</b>       | 3                | 876             | 1256             | 89.04                     | 65.90               |
| <b>Striatum</b>     | 3                | 807             | 787              | 96.41                     | 98.86               |
| <b>PPN</b>          | 3                | 539             | 667              | 95.92                     | 77.51               |
| <b>LDT</b>          | 3                | 1034            | 1426             | 94.49                     | 68.51               |

**Table S2.** Number of cholinergic neurons in 22 brain regions.

|        | <b>Number of cholinergic neurons</b> | <b>s.e.m</b> |
|--------|--------------------------------------|--------------|
| mPFC   | 73                                   | 13           |
| MOp    | 178                                  | 22           |
| MOs    | 163                                  | 21           |
| SSp    | 330                                  | 18           |
| VISp   | 169                                  | 21           |
| HPF    | 53                                   | 11           |
| ARH    | 42                                   | 7            |
| DMH    | 71                                   | 4            |
| MS/VDB | 1665                                 | 178          |
| HDB    | 3123                                 | 238          |
| MH     | 2732                                 | 183          |
| III/IV | 673                                  | 55           |
| PBG    | 268                                  | 39           |
| PG     | 2039                                 | 220          |
| V      | 1060                                 | 46           |
| VI     | 136                                  | 9            |
| LDT    | 574                                  | 28           |
| PPN    | 578                                  | 50           |
| VII    | 2993                                 | 161          |
| Amb    | 392                                  | 33           |
| X      | 1947                                 | 78           |
| XII    | 1885                                 | 41           |

**Table S3.** Soma volume of cholinergic neurons in 14 brain regions.

|        | <b>Cholinergic neuron volume (<math>\mu\text{m}^3</math>)</b> | <b>s.e.m</b> |
|--------|---------------------------------------------------------------|--------------|
| MS/VDB | 596.73                                                        | 54.27        |
| HDB    | 840.12                                                        | 53.36        |
| MH     | 330.32                                                        | 40.29        |
| PBG    | 882.51                                                        | 65.99        |
| PPN    | 1009.05                                                       | 119.32       |
| LDT    | 1299.56                                                       | 109.65       |
| PG     | 471.78                                                        | 40.86        |
| Amb    | 2296.85                                                       | 372.11       |
| III/IV | 1017.69                                                       | 106.81       |
| V      | 2303.76                                                       | 163.09       |
| VI     | 1770.65                                                       | 171.69       |
| VII    | 2142.78                                                       | 230.37       |
| X      | 1919.34                                                       | 91.91        |
| XII    | 2732.71                                                       | 81.75        |

**Table S4.** Co-expression ratios of GFP (Chat-ires-Cre: Ai47) and primary interneuron markers (in situ hybridization or immunofluorescence staining) in the cortex.

| <b>Interneuron marker</b> | <b>Mouse NO.</b> | <b>GFP+ NO.</b> | <b>Colocalization(%)</b> |
|---------------------------|------------------|-----------------|--------------------------|
| <b>VIP</b>                | 3                | 139             | 94.87                    |
| <b>PV</b>                 | 3                | 127             | 0                        |
| <b>SST</b>                | 3                | 112             | 0                        |

**Table S5.** The percentage of cholinergic neurons in L2/3 and L4-6 in different cortical regions.

|             | <b>L2/3</b> | <b>s.e.m</b> |             | <b>L4-6</b> | <b>s.e.m</b> |
|-------------|-------------|--------------|-------------|-------------|--------------|
| <b>mPFC</b> | 88.70661    | 3.233957     | <b>mPFC</b> | 11.29339    | 3.233957     |
| <b>M1</b>   | 73.56727    | 1.252281     | <b>M1</b>   | 26.43273    | 1.252281     |
| <b>M2</b>   | 83.73701    | 1.141685     | <b>M2</b>   | 16.26299    | 1.141685     |
| <b>S1</b>   | 84.24741    | 1.751588     | <b>S1</b>   | 15.75259    | 1.751588     |
| <b>V1</b>   | 95.95534    | 1.056959     | <b>V1</b>   | 4.044663    | 1.056959     |

**Table S6. Abbreviation for brain area.**

|       |                                              |                   |                                            |
|-------|----------------------------------------------|-------------------|--------------------------------------------|
| AAA   | Anterior amygdalar area                      | MH                | medial habenula                            |
| ACA   | Anterior cingulate area                      | mlf               | medial longitudinal fascicle               |
| ACB   | Nucleus accumbens                            | MOB               | Main olfactory bulb                        |
| aco   | anterior commissure, olfactory limb          | MOp               | primary motor area                         |
| AM    | anteromedial nucleus of thalamus             | MOs               | secondary motor area                       |
| Amb   | nucleus ambiguus                             | mPFC              | medial prefrontal cortex                   |
| AOB   | Accessory olfactory bulb                     | MRN               | midbrain reticular nucleus                 |
| AON   | Anterior olfactory nucleus                   | MS                | medial septal nucleus                      |
| AONm  | anterior olfactory nucleus, medial part      | NLOT              | Nucleus of the lateral olfactory tract     |
| ARH   | arcuate hypothalamic nucleus                 | ORBm              | Orbital area, medial part                  |
| AUDd  | Dorsal auditory area                         | ORBvl             | Orbital area, ventrolateral part           |
| BST   | Bed nuclei of the stria terminalis           | OT                | Olfactory tubercle                         |
| CA1   | Field CA1                                    | PAA               | Piriform-amygdalar area                    |
| CA2   | Field CA2                                    | PAG               | periaqueductal gray                        |
| CA3   | Field CA3                                    | PBG               | parabigeminal nucleus                      |
| cc    | corpus callosum                              | PG                | pontine grey                               |
| COA   | Cortical amygdalar area                      | PIR               | Piriform area                              |
| CP    | Caudoputamen                                 | PL                | Prelimbic area                             |
| df    | dorsal fornix                                | PPN               | pedunculopontine nucleus                   |
| DG    | Dentate gyrus                                | PRC               | Precommissural nucleus                     |
| dhc   | dorsal hippocampal commissure                | PRE               | Presubiculum                               |
| DMH   | dorsomedial nucleus of hypothalamus          | PVH               | Paraventricular hypothalamic nucleus       |
| ENTl  | Entorhinal area, lateral part                | RSP               | Retrosplenial area                         |
| ENTm  | entorhinal area, medial part                 | SC                | Superior colliculus                        |
| Epv   | Endopiriform nucleus, ventral part           | SF                | Septofimbrial nucleus                      |
| fi    | fimbria                                      | SSp               | primary somatosensory area                 |
| gVIIN | genu of facial nerve                         | SUB               | Subiculum                                  |
| HDB   | the horizontal limb of diagonal band nucleus | TH                | Thalamus                                   |
| HPF   | hippocampal formation                        | TR                | Postpiriform transition area               |
| IC    | Inferior colliculus                          | TRS               | Triangular nucleus of septum               |
| III   | oculomotor nucleus                           | TT                | Taenia tecta                               |
| IL    | Infralimbic area                             | V                 | motor nucleus of trigeminal                |
| IV    | trochlear nucleus                            | VCO               | ventral cochlear nucleus                   |
| LDT   | laterodorsal tegmental nucleus               | VDB               | the vertical limb of diagonal band nucleus |
| LHA   | Lateral hypothalamic area                    | VI                | abducens nerve                             |
| lot   | lateral olfactory tract, body                | VII               | facial motor nucleus                       |
| LPAG  | lateral periaqueductal gray                  | VIII <sub>n</sub> | vestibular nerve                           |
| LPO   | Lateral preoptic area                        | VII <sub>n</sub>  | facial nerve                               |
| LS    | Lateral septal nucleus                       | VISp              | Primary visual area                        |
| MD    | mediodorsal nucleus of thalamus              | X                 | dorsal motor nucleus of vagus              |
| MEA   | Medial amygdalar nucleus                     | XII               | hypoglossal nucleus                        |



## **Supplementary Text**

### **Supplementary Materials and Methods**

#### **Genetically modified mice**

*Chat-ires-Cre* mice (018957) were obtained from the Jackson lab. The use and care of animals complied with the guidelines of the Animal Advisory Committee at the Shanghai Institutes for Biological Science, CAS. The raw data are publicly available on our lab homepage for the Visible Brain-wide Networks project: <http://vbn.org.cn/>.

The original-resolution images are available upon request on a hard drive.

#### **Construction of Ai47 mice**

In the Ai47 mouse line, the Rosa26 locus has been modified by targeted insertion of a construct containing the strong and ubiquitously active CAG promoter, a loxP-flanked stop cassette, a triple GFP gene unit, a woodchuck hepatitis virus posttranscriptional regulatory element (WPRE) and a polyA signal. The triple GFP unit was generated by gene synthesis (GenScript Corp.) and contains sequences for Emerald-GFP (Life Technologies), TagGFP2 (Evrogen) and humanized Renilla GFP variants, which were linked together by viral T2A and P2A oligopeptide sequences. The Ai47-targeting construct was transfected into the 129S6B6F1 hybrid ES cell line G4, and correctly targeted clones were identified by PCR and Southern blotting and then injected into C57BL/6J blastocysts to obtain chimeras for eventual germline breeding. The resulting mice were crossed with the Rosa26-PhiC31 line (JAX Stock #007743) to delete the



PGK-Neo selection cassette through PhiC31-mediated recombination between the AttB and AttP recombinase sites in the germline of the mice. Ai47 mice were crossed with *Chat-ires-Cre* mice, and the double-positive mice (3-6 months old) were used in the present study.

### **Virus injection**

Recombinant adeno-associated virus (AAV-CAG-FIEX-GFP, Serotype: 9, UNC Gene Therapy Center Vector Core, Chapel Hill, NC, USA) was used as the anterograde tracer in 2-month-old *Chat-ires-Cre* mice. A total of 80 nL of virus was injected using a pressure injector (Nanject II; Drummond Scientific Co., Broomall, PA, USA). The stereotaxic coordinates for the target area were based on the Mouse Brain in the Stereotaxic Coordinates atlas. For NDB, the injection site was set to 0.98 mm A-P, 0 mm medial-lateral (M-L), and 4.8 mm dorsal-ventral (D-V). The mice recovered quickly after surgery and survived 28 days before euthanasia.

### **Tissue preparation**

All histological procedures have been described previously(1-4).

Briefly, for whole-brain imaging, the mice were anesthetized and perfused with 0.01 M PBS (Sigma-Aldrich Inc., St. Louis, US), followed by 4% paraformaldehyde (PFA) and 2.5% sucrose in 0.01 M PBS. The brains were postfixed in 4% PFA for 24 h. After fixation, each intact brain was rinsed and subsequently dehydrated via immersion in a graded ethanol series. Then, each brain was impregnated with Glycol Methacrylate

(GMA, Ted Pella Inc., Redding, CA) and embedded in a vacuum oven.

For AAV/RV-tracing experiments, the mice were perfused with PBS followed by PFA. After post-fixation in PFA, consecutive 75- $\mu$ m coronal sections were collected using a cryostat (Leica VT1200), washed  $3 \times 20$  min with PBS, and stained with DAPI (1:10000 of 5 mg/ml, Sigma-Aldrich), which was included in the last PBS wash. Slides were cover-slipped. Samples were imaged using a Zeiss LSM 710 confocal microscope (Carl Zeiss, LSM710).

### **Instrument**

As described in our previous work (4), the whole-brain imaging system consists of three parts: a structured-illumination microscope, a microtome and the control system. The light source is a mercury lamp with high flexibility in wavelength selection. A high-precision 3D translation stage moves the sample, while a diamond knife (DIATOME) is used on the microtome to remove the imaged sections. The control system is divided into a data acquisition portion and a motion control portion for robustness considerations.

### **Whole-brain imaging**

Our previous work showed that the GMA formulation improves fluorescence preservation of EGFP-labeled neurons nearly twofold if the solution pH is alkaline (2, 3). To preserve the fluorescence of EGFP during whole-brain imaging, the embedded sample was placed in a 0.01 M  $\text{Na}_2\text{CO}_3$  solution. The whole-brain sample was

immobilized in an antero-posterior (A-P) direction in the water bath on the 3D translation stage. When these imaging parameters are set, the whole-brain imaging system performs the sectioning and imaging process automatically to complete the brain-wide dataset acquisition.

The dataset, consisting of  $1700 \times 1800$  pixel-sized tiles, was saved at 16-bit depth in a LZW-compression TIF format. After collection, we sent the entire dataset to a PB-sized distributed storage by way of a standard 10-Gigabit fiber.

### **Image processing**

Image processing was performed based on our previously developed algorithm (1, 4-6). Image preprocessing is implemented in C++, parallel-optimized with Intel MPI Library (v3.2.2.006), and executed on a computing server. Following preprocessing, we imported the standard dataset to Amira software (v5.2.2, Mercury Computer Systems, San Diego, CA, USA) for visualization on desktop graphical workstations. Almost all figures and movies were obtained with basic operations in Amira and Fiji, including extracting the interesting regions, resampling or interpolation, maximum-intensity projection, volume rendering, moviemaker with the main module, man-machine interactive with Filament editor and with segmentation editor, etc. Briefly, the dataset acquired by the dual-color precise imaging system was separated into the GFP and PI channels. The PI-labeled data set was imported into Amira to manually generate the outline of the mouse brain.

Cholinergic neuron characterizations were calculated with Amira, Imaris software

(Bitplane AG, Zurich) and NeuroGPS software (7). Briefly, NeuroGPS software was used to count the GFP-labeled neurons in the whole brain. Before calculation of the volume of each neuron, preprocessing was performed, including isolating the dataset for the chosen brain regions with Amira software. Imaris software was used to quantify the neuron volume. In addition, we calculated the volume of selected regions using Amira software. Data from both brain hemispheres were used here.

To distinguish the brain regions, we aligned the whole-brain dataset to the Allen Reference Atlas according to previous studies (5, 6). Here, we used the Common Coordinate Framework V3 (the 3rd version of the Allen Reference Atlas, abbreviated as CCF)(8), as the registration template. For this Framework, the resolution was  $10 \times 10 \times 10 \mu\text{m}$ . We down-sampled the raw data from the PI-staining results from  $0.32 \times 0.32 \times 2 \mu\text{m}$  to  $10 \times 10 \times 10 \mu\text{m}$ . Then, we manually segmented the cytoarchitectural information of several brain regions as landmarks. Finally, we registered the figures of the GFP channel to the results of the PI channel. Then, we loaded the outline of mouse brain and the tracing results into Amira simultaneously and used the moviemaker module of Amira to generate movies.

When analyzing the projection patterns in the whole brain, we performed an affine transformation and a symmetric image normalization (9-11) in Advanced Normalization Tool (10, 12) to achieve the 3D co-registration of the PI-stained dataset with the Allen template dataset. Three skilled technicians independently performed back-to-back manual validation and amendment in Amira software, followed by cross-validations.

## **Cholinergic neuron reconstruction and morphological analysis**

Following a previous procedure (4), the reconstructions of the cortical cholinergic neurons was completed interactively in Amira visualization and data analysis software (Visage Software, San Diego, CA). In Amira, the whole-brain dataset was converted into a large-disk data object, and the fibers in each sub-volume were traced interactively. The reconstructed neurons were checked back-to-back by 3 persons.

The morphologies of cholinergic neurons were highly diverse. We traced 50 individual cholinergic neurons in the vertical limb of the diagonal band nucleus. The locations of the soma and every axonal terminal were distinguished in the aligned dataset of the whole brain. Cortical cholinergic neurons were reconstructed and then classified based on their soma and dendritic geometry (thickness, bifurcation, angle, branching order) (13). Bipolar cells (BPCs) have narrow bipolar dendrites extending to L1 and L6. Bitufted cells (BTCs) have two bundles of vertically oriented dendrites with a bitufted morphological pattern. Double bouquet cells (DBC) have a narrow, bitufted dendritic tree. Multi-polar neurons have multi-polar dendrites that form spherical dendritic fields. We compared the lengths and branch numbers of the dendrites of neurons in different layers of M1, V1 and S1.

## **Histology and image analysis**

For immunohistochemical staining, adult *Chat-ires-Cre:Ai47* mice (2-6 months old) were perfused with PBS followed by 4% PFA in phosphate buffer. The brain was

extracted and postfixed in 4% PFA for 4 h at 4 °C. Dehydration was performed in 30% sucrose in PBS, and coronal brain slices at 50- $\mu$ m thickness were prepared using a vibratome (Leica, CM1950). Brain slices were blocked for 1 h at room temperature in PBS-T (0.3% Triton X-100) with 5% bovine serum albumin, fraction V. The primary antibodies used were goat anti-ChAT (Millipore, AB144P, 1:400), mouse anti-PV (Millipore, MAB1572, 1:1000), goat anti-SST (Santa Cruz, sc-7819, 1:250), and rabbit anti-GFP (Invitrogen, A11122, 1:1000). The secondary antibodies used were donkey anti-goat IgG Alexa 555 (Invitrogen, A21432, 1:1000), donkey anti-mouse IgG Alexa546 (Life technologies, A10036, 1:1000), and donkey anti-rabbit IgG Alexa488 (Life technologies, A21206, 1:1000). For VIP in situ hybridization, experiments were performed according to standard methods. VIP sense and anti-sense probes were chosen from the Allen Brain Atlas at [www.brain-map.org](http://www.brain-map.org). All images were acquired on a Nikon TiE-A1 plus confocal microscope, and cell counting was carried out manually using ImageJ.

### **Statistical analysis**

Statistical significance was analyzed using GraphPad Prism. All measurements are listed as the mean  $\pm$  s.e.m. Statistical comparisons were performed using Student's t-test and ANOVA.

### **Reference:**

1. Gong H, Zeng S, Yan C, *et al.* (2013) Continuously tracing brain-wide long-distance axonal projections in mice at a one-micron voxel resolution. *NeuroImage* 74:87-98.

2. Yang Z, Hu B, Zhang Y, *et al.* (2013) Development of a plastic embedding method for large-volume and fluorescent-protein-expressing tissues. *PloS one* 8(4):e60877.
3. Xiong H, Zhou Z, Zhu M, *et al.* (2014) Chemical reactivation of quenched fluorescent protein molecules enables resin-embedded fluorescence microimaging. *Nature communications* 5:3992.
4. Gong H, Xu D, Yuan J, *et al.* (2016) High-throughput dual-colour precision imaging for brain-wide connectome with cytoarchitectonic landmarks at the cellular level. *Nature communications* 7:12142.
5. Peng J, Long B, Yuan J, *et al.* (2017) A Quantitative Analysis of the Distribution of CRH Neurons in Whole Mouse Brain. *Frontiers in neuroanatomy* 11(63).
6. Li Y, Gong H, Yang X, *et al.* (2017) TDat: An Efficient Platform for Processing Petabyte-Scale Whole-Brain Volumetric Images. *Frontiers in neural circuits* 11.
7. Quan T, Zhou H, Li J, *et al.* (2016) NeuroGPS-Tree: automatic reconstruction of large-scale neuronal populations with dense neurites. *Nature methods* 13(1):51-54.
8. Kuan L, Li Y, Lau C, *et al.* (2015) Neuroinformatics of the Allen Mouse Brain Connectivity Atlas. *Methods* 73:4-17.
9. Rueckert D, Sonoda LI, Hayes C, *et al.* (1999) Nonrigid registration using free-form deformations: application to breast MR images. *IEEE Trans Med Imaging* 18(8):712-721.
10. Klein A, Andersson J, Ardekani BA, *et al.* (2009) Evaluation of 14 nonlinear deformation algorithms applied to human brain MRI registration. *NeuroImage* 46(3):786-802.
11. Ni H, Ren M, Zhong Q, *et al.* (2015) Co-registration of diffusion tensor imaging and micro-optical imaging based on ants.
12. Avants BB, Tustison NJ, Song G, *et al.* (2011) A reproducible evaluation of ANTs similarity metric performance in brain image registration. *NeuroImage* 54(3):2033-2044.
13. Jiang X, Shen S, Cadwell CR, *et al.* (2015) Principles of connectivity among morphologically defined cell types in adult neocortex. *Science* 350(6264):aac9462.

## Supplementary Figure Legends

**Supplementary Figure 1. Analysis of expression specificity of *Chat-ires-Cre:Ai47* mice in the MHb, PBG and motor nucleus.**

A. In the MHb, almost all GFP-positive neurons were ChAT positive, and the number of ChAT-positive neurons was far higher than the number of GFP-positive neurons. B. As in the MH, almost all GFP-positive neurons were ChAT positive, and ChAT-positive neurons vastly outnumbered GFP-positive neurons, in the PBG. C. In the oculomotor nucleus (III), GFP and ChAT showed precise co-labeled. Scale bar: 100  $\mu\text{m}$ .

### **Supplementary Figure 2. Whole-brain imaging of the cholinergic neurons.**

A. Workflow of the Cre-dependent AAV injection approach. B. Diagram of the whole-brain imaging procedure in the brain positioning system. C. All coronal sections were self-segmented, and their figures were used for reconstruction of the whole brain in 3D. D. The whole-brain dataset can be re-sectioned at any angle (horizontal, sagittal, etc.). (E-H) Coronal, sagittal and horizontal views of GFP-labeled neurons showed the distribution of neurons in the HDB, MH, III and V nuclei.

### **Supplementary Figure 3. Cholinergic neuron distribution in sagittal sections.**

A. PI was applied to the imaging buffer for real-time staining to dissect the anatomical structure while detecting the GFP signals. Continuous coronal sections taken at 500- $\mu\text{m}$  intervals showed PI-stained slices from a mouse brain. The thickness of the section was 2  $\mu\text{m}$ . B. Corresponding coronal sections are maximum-intensity projection showing GFP-labeled cholinergic neurons in the entire mouse brain. The thickness of the projection was 50  $\mu\text{m}$ . Scale bar: 500  $\mu\text{m}$ . C. Registration of raw images onto



corresponding coronal sections of the Allen Reference Atlas. The registration module applied several geometric transformations of the raw PI-staining image to optimize the match of reference points between the raw image and atlas. D. The GFP-channel image was registered to the Allen Reference Atlas with the reference points in the PI-staining image. E, F. The raw data of coronal sections were registered to the Paxinos brain atlas. G, H. the raw data were registered to the Allen Common Coordinate Framework (<http://mouse.brain-map.org/static/atlas>). I. The continuous coronal sections of the whole-brain dataset were aligned to the Allen Framework. The yellow lines show the edge of the brain region.

**Supplementary Figure 4. Soma volumes of cholinergic neurons in subcortical nuclei.**

A. Images of 6 sections showing the architectonic structure of subcortical regions in the whole brain. Scale bar: 500  $\mu\text{m}$ . B. Illustration of cholinergic neurons in MS/VDB, V and VII nuclei. Scale bar: 200  $\mu\text{m}$ . C. Magnified view showing neuronal soma in different regions. Scale bar: 50  $\mu\text{m}$ . D. Cell bodies of cholinergic neurons in the boxed area in (C), including MS/VDB, MH, III, V, VI, VII and XII nuclei. Scale bar: 10  $\mu\text{m}$ . E. Soma volumes of cholinergic neurons in 14 sub-regions of a single hemisphere (n = 10 from 5 brains).

**Supplementary Figure 5. Axonal projections of cholinergic neurons in midbrain and brainstem.**

A. Coronal sections showed cholinergic nuclei in midbrain and brainstem. Every image is the preview of the maximum intensity projection that the thickness is 500  $\mu\text{m}$ . B-F. Magnified views of the regions in A showed an aggregate distribution of cholinergic neurons in III, V, VI, VII, X and XII while some of their axonal projections arrayed in slender bands. B. The solid arrow showed where the branches of III separated from the bundles of axonal fibers. The hollow arrowheads labeled where the axonal fibers re-access in the bundles of nerve fiber. C. the arrows with tail showed the axonal projection from V to the ipsilateral area through mlf and the arrows without tail showed the ipsilateral fibers to gVIIIn. D. The arrows showed the branches from VIIIn and projected to VCO. The star showed the terminal in VCO from the branches. E. The projections of X divided in many bundles with some fibers crossed between different bundles. F. The large view of labeled part in E. G. The diagram showed the different projections patterns of the cholinergic neurons in these motor nuclei.

**Supplementary Figure 6. 3D distribution of cholinergic neurons in the MS/VDB and the axon arbors of the reconstructed neurons.**

A. Horizontal view of the 50 reconstructed neurons and the distribution of neuronal soma. The soma of individual neurons were labeled with four colors: green for those that mainly project to the hippocampal formation, yellow for those that mainly project to the olfactory area, red for those that mainly project to non-cortical olfactory areas, and blue for those that mainly project to cortex and other areas. B. Serial coronal sections aligned to the Allen Framework showing the axonal locations of the

reconstructed neurons. C. 3D view of the #1 neuron and the details of the axon arbors in different areas. The insert figure is a maximum-intensity projection (thickness: 100  $\mu\text{m}$ ) of the coronal section showing the location of #1 and #12. D. 3D view of the #12 neuron and the details of the axon arbors in different areas. E. 3D view of the #5 neuron and #13 neuron located in VDB and the details of the axon arbors in different areas. The inset fluorescence image is raw data from the coronal section (thickness: 2  $\mu\text{m}$ ) showing the location of the neurons (#5 and #13). F. Horizontal and sagittal view of neurons (#22, #42) that project to different areas.

**Supplementary Figure 7. Co-expression profile of interneuron markers and GFP (*Chat-ires-Cre:Ai47*) in cortex.**

A. In situ hybridization showing that GFP<sup>+</sup> neurons mostly co-expressed VIP. Arrows, GFP and VIP co-expressing neurons; arrowheads, VIP-positive neurons. B, C. Immunofluorescence staining showing that almost all GFP<sup>+</sup> neurons were PV and SST negative. Arrows, GFP-positive neurons; arrowheads, PV- or SST-positive neurons. Scale bar, 100  $\mu\text{m}$ . D. Statistical results of co-expression profile. Error bar: s.e.m. n = 3 mice.
